# Supplementary material for: Overexpression of Canonical Prefoldin Associates with the Risk of Mortality and Metastasis in Non-Small Cell Lung Cancer
Source: PubMed Central journal article supplement (PMC7225921; doi:10.3390/cancers12041052), 2020-04-24
Supplement: cancers-12-01052-s001.pdf [file cancers-12-01052-s001.pdf]

# Supplementary Materials: Overexpression of Canonical Prefoldin Associates with the Risk of Mortality and Metastasis in Non-Small Cell Lung Cancer

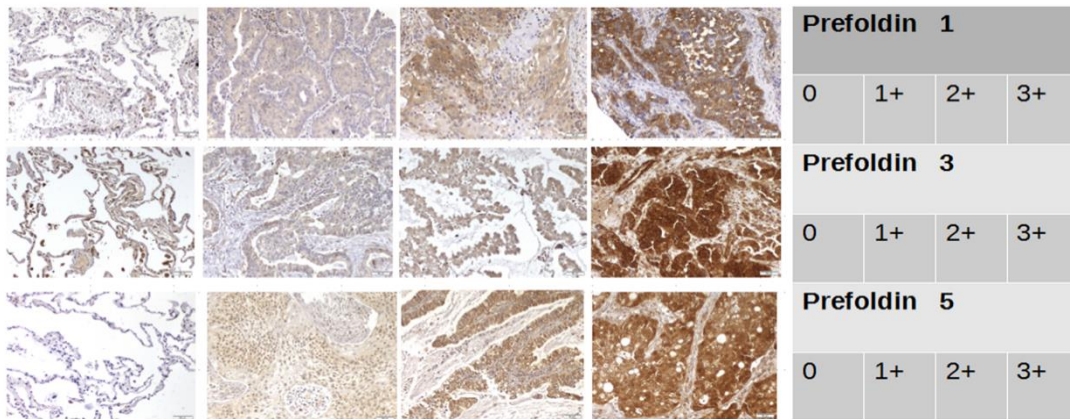

**Figure S1.** Prefoldin expression was semi-quantitatively scored by two independent pathologists on a range of 0 to 3+. Scale bar: 50  $\mu$ m.

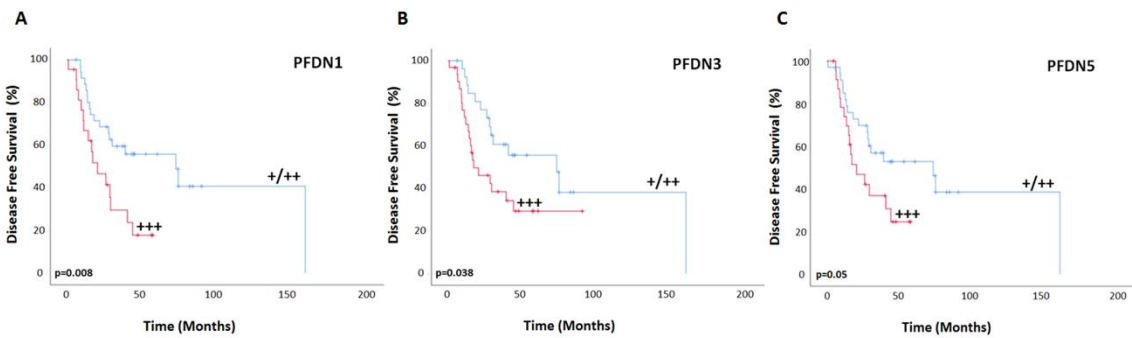

**Figure S2.** Kaplan–Meier curves of all 58 patients for disease-free survival (DFS) according to PFDN expression. Patients with PFDN1 (A), 3 (B) and 5 (C) overexpression had lower DFS.

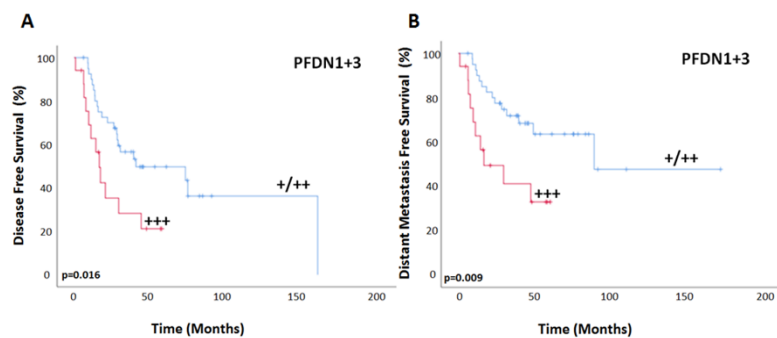

**Figure S3.** Kaplan–Meier curves of all 58 patients for (A) disease-free survival (DFS) and (B) distant metastasis-free survival (DMFS) when combining all overexpressed PFDNs. Patients with PFDN1 and 3 overexpression had lower (A) DFS and (B) DMFS.

**Table S1.** Univariate analyses of the associations between patient characteristics and prefoldin (PFDN) protein expression levels and the outcome.

| Parameter              | Overall Survival |            |                | Disease-Free Survival |            |                | Local Recurrence |           |                | Distant Metastases |           | <i>p</i> -value |
|------------------------|------------------|------------|----------------|-----------------------|------------|----------------|------------------|-----------|----------------|--------------------|-----------|-----------------|
|                        | HR               | 95% CI     | <i>p</i> value | HR                    | 95% CI     | <i>p</i> value | HR               | 95% CI    | <i>p</i> value | HR                 | 95% CI    |                 |
| Gender                 |                  |            |                |                       |            |                |                  |           |                |                    |           |                 |
| Male (Ref)             | 1                |            |                | 1                     |            |                | 1                |           |                | 1                  |           |                 |
| Female                 | 0.47             | 0.14–1.56  | 0.221          | 0.84                  | 0.29–2.40  | 0.751          | 0.50             | 0.11–2.18 | 0.360          | 0.98               | 0.29–3.33 | 0.985           |
| Age, years             |                  |            |                |                       |            |                |                  |           |                |                    |           |                 |
| ≤67 (Ref)              | 1                |            |                | 1                     |            |                | 1                |           |                | 1                  |           |                 |
| >67                    | 0.83             | 0.43–1.59  | 0.584          | 0.80                  | 0.59–1.41  | 0.695          | 0.71             | 0.30–1.70 | 0.451          | 0.70               | 0.31–1.60 | 0.410           |
| COPD                   |                  |            |                |                       |            |                |                  |           |                |                    |           |                 |
| No (Ref)               | 1                |            |                | 1                     |            |                | 1                |           |                | 1                  |           |                 |
| Yes                    | 0.99             | 0.52–1.89  | 0.984          | 0.58                  | 0.28–1.21  | 0.149          | 1.13             | 0.47–2.72 | 0.773          | 0.49               | 0.20–1.20 | 0.122           |
| Cardiovascular disease |                  |            |                |                       |            |                |                  |           |                |                    |           |                 |
| No (Ref)               | 1                |            |                | 1                     |            |                | 1                |           |                | 1                  |           |                 |
| Yes                    | 1.89             | 0.92–3.87  | 0.079          | 1.37                  | 0.62–3.062 | 0.430          | 1.31             | 0.47–3.59 | 0.600          | 2.28               | 0.96–5.40 | 0.059           |
| Smoking status         |                  |            |                |                       |            |                |                  |           |                |                    |           |                 |
| Former/Never (Ref)     | 1                |            |                | 1                     |            |                | 1                |           |                | 1                  |           |                 |
| Current                | 1.36             | 0.72–2.58  | 0.340          | 0.70                  | 0.35–1.42  | 0.336          | 0.69             | 0.28–1.67 | 0.419          | 1.04               | 0.46–2.33 | 0.917           |
| Alcohol                |                  |            |                |                       |            |                |                  |           |                |                    |           |                 |
| No (Ref)               | 1                |            |                | 1                     |            |                | 1                |           |                | 1                  |           |                 |
| Yes                    | 1.14             | 0.59–2.21  | 0.682          | 0.97                  | 0.48–1.94  | 0.934          | 0.70             | 0.29–1.70 | 0.437          | 1.34               | 0.59–3.05 | 0.476           |
| KPS                    |                  |            |                |                       |            |                |                  |           |                |                    |           |                 |
| ≥80 (Ref)              | 1                |            |                | 1                     |            |                | 1                |           |                | 1                  |           |                 |
| <80                    | 1.63             | 0.80–3.322 | 0.179          | 0.86                  | 0.35–2.10  | 0.747          | 0.88             | 0.29–2.65 | 0.820          | 0.81               | 0.27–2.40 | 0.713           |
| Weight                 |                  |            |                |                       |            |                |                  |           |                |                    |           |                 |
| <78 (Ref)              | 1                |            |                | 1                     |            |                | 1                |           |                | 1                  |           |                 |
| ≥78                    | 0.60             | 0.31–1.16  | 0.133          | 0.46                  | 0.22–0.94  | 0.034          | 0.63             | 0.26–1.52 | 0.307          | 0.27               | 0.10–0.69 | 0.006           |
| Body Surface           |                  |            |                |                       |            |                |                  |           |                |                    |           |                 |
| <188 (Ref)             | 1                |            |                | 1                     |            |                | 1                |           |                | 1                  |           |                 |
| ≥188                   | 0.41             | 0.21–0.81  | 0.010          | 0.46                  | 0.22–0.93  | 0.033          | 0.85             | 0.35–2.04 | 0.726          | 0.22               | 0.08–0.56 | 0.002           |
| Tumor Histology        |                  |            |                |                       |            |                |                  |           |                |                    |           |                 |
| Adeno (Ref)            | 1                |            |                | 1                     |            |                | 1                |           |                | 1                  |           |                 |
| Squamous cell          | 0.92             | 0.48–1.78  | 0.821          | 0.76                  | 0.38–1.52  | 0.445          | 1.60             | 0.64–4.02 | 0.314          | 0.49               | 0.22–1.12 | 0.092           |

|                          |      |           |       |      |           |       |      |           |       |      |            |       |  |
|--------------------------|------|-----------|-------|------|-----------|-------|------|-----------|-------|------|------------|-------|--|
| Clinical stage           |      |           |       |      |           |       |      |           |       |      |            |       |  |
| I - II (Ref)             | 1    |           |       | 1    |           |       | 1    |           |       | 1    |            |       |  |
| III - IV                 | 2.04 | 0.94–4.42 | 0.069 | 2.12 | 0.94–4.74 | 0.067 | 1.28 | 0.51–3.23 | 0.596 | 3.94 | 1.17–13.29 | 0.027 |  |
| Surgery                  |      |           |       |      |           |       |      |           |       |      |            |       |  |
| No (Ref)                 | 1    |           |       | 1    |           |       | 1    |           |       | 1    |            |       |  |
| Yes                      | 0.42 | 0.17–1.04 | 0.061 | 0.51 | 0.17–1.46 | 0.210 | 0.71 | 0.16–3.09 | 0.651 | 0.34 | 0.11–1.00  | 0.051 |  |
| Chemotherapy             |      |           |       |      |           |       |      |           |       |      |            |       |  |
| No (Ref)                 | 1    |           |       | 1    |           |       | 1    |           |       | 1    |            |       |  |
| Yes                      | 1.55 | 0.75–3.18 | 0.231 | 1.75 | 0.78–3.89 | 0.170 | 1.30 | 0.50–3.37 | 0.590 | 4.59 | 1.34–15.75 | 0.015 |  |
| Concomitant chemotherapy |      |           |       |      |           |       |      |           |       |      |            |       |  |
| No (Ref)                 | 1    |           |       | 1    |           |       | 1    |           |       | 1    |            |       |  |
| Yes                      | 3.31 | 1.38–7.93 | 0.007 | 2.51 | 0.94–6.68 | 0.066 | 2.16 | 0.61–7.70 | 0.231 | 3.88 | 1.38–10.91 | 0.010 |  |
| Radiotherapy             |      |           |       |      |           |       |      |           |       |      |            |       |  |
| No (Ref)                 | 1    |           |       | 1    |           |       | 1    |           |       | 1    |            |       |  |
| Yes                      | 1.84 | 0.92–3.66 | 0.082 | 1.59 | 0.79–3.2  | 0.189 | 1.21 | 0.49–2.96 | 0.667 | 3.39 | 1.44–7.96  | 0.015 |  |
| PFDN1*                   |      |           |       |      |           |       |      |           |       |      |            |       |  |
| 0/+ /++ (Ref)            | 1    |           |       | 1    |           |       | 1    |           |       | 1    |            |       |  |
| +++                      | 2.86 | 1.47–5.56 | 0.002 | 2.53 | 1.24–5.15 | 0.010 | 1.68 | 0.67–4.23 | 0.266 | 2.94 | 1.28–6.73  | 0.011 |  |
| PFDN3*                   |      |           |       |      |           |       |      |           |       |      |            |       |  |
| 0/+ /++ (Ref)            | 1    |           |       | 1    |           |       | 1    |           |       | 1    |            |       |  |
| +++                      | 2.30 | 1.17–4.50 | 0.015 | 2.09 | 1.02–4.27 | 0.042 | 1.50 | 0.62–3.63 | 0.362 | 2.50 | 1.06–5.88  | 0.036 |  |
| PFDN5*                   |      |           |       |      |           |       |      |           |       |      |            |       |  |
| 0/+ /++ (Ref)            | 1    |           |       | 1    |           |       | 1    |           |       | 1    |            |       |  |
| +++                      | 2.94 | 1.50–5.76 | 0.002 | 2.00 | 0.98–4.06 | 0.055 | 1.74 | 0.70–4.32 | 0.227 | 1.94 | 0.85–4.42  | 0.112 |  |

Abbreviations: HR. hazard ratio; COPD. Chronic obstructive pulmonary disease; KPS. Karnofsky performance status; PFDN. Prefoldin. \* (+), weak expression; 2 (++) , strong expression, and 3 (+++), very strong expression

**Table S2.** Multivariate analyses of the associations between patient characteristics and PFDN expression and outcome.

| Parameter                | Overall Survival |           |         | Disease Free Survival |           |         | Distant Metastases |           |         |
|--------------------------|------------------|-----------|---------|-----------------------|-----------|---------|--------------------|-----------|---------|
|                          | HR               | 95% CI    | p value | HR                    | 95% CI    | p value | HR                 | 95% CI    | p value |
| Body Surface             |                  |           |         |                       |           |         |                    |           |         |
| <188 (Ref)               |                  |           |         |                       |           |         | 1                  |           |         |
| ≥188                     |                  |           |         |                       |           |         | 0.27               | 0.10-0.72 | 0.009   |
| Concomitant Chemotherapy |                  |           |         |                       |           |         |                    |           |         |
| No (Ref)                 | 1                |           |         |                       |           |         |                    |           |         |
| Yes                      | 3.76             | 1.55-9.11 | 0.003   |                       |           |         |                    |           |         |
| Radiotherapy             |                  |           |         |                       |           |         |                    |           |         |
| No (Ref)                 |                  |           |         |                       |           |         | 1                  |           |         |
| Yes                      |                  |           |         |                       |           |         | 3.44               | 1.42-8.34 | 0.006   |
| PFDN1                    |                  |           |         |                       |           |         |                    |           |         |
| 0/+ /++ (Ref)            |                  |           |         | 1                     |           |         | 1                  |           |         |
| +++                      |                  |           |         | 2.53                  | 1.24-5.15 | 0.010   | 2.32               | 0.98-5.45 | 0.053   |
| PFDN5                    |                  |           |         |                       |           |         |                    |           |         |
| 0/+ /++ (Ref)            | 1                |           |         |                       |           |         |                    |           |         |
| +++                      | 3.13             | 1.59-6.15 | 0.001   |                       |           |         |                    |           |         |

Abbreviations: HR, hazard ratio; PFDN, prefoldin. \* (+), weak expression; 2 (++) , strong expression, and 3 (+++), very strong expression
